# Supplementary material for: Hierarchical ZnO nanostructures: controlling the synthesis and photocatalytic decomposition of nitrogen monoxide
Source: Royal Society of Chemistry journal article supplement (doi:10.1039/c3ra42719f), 2013-01-01
Supplement: c3ra42719f.pdf [file c3ra42719f.pdf]

## Supplementary Information

### **Hierarchical ZnO Nanostructures: Controlling the Synthesis and Photocatalytic Decomposition of Nitrogen Monoxide†**

Quang Duc Truong<sup>a,b</sup>, Thi Hang Le<sup>a</sup>, Takeshi Kimura<sup>b</sup>, Shu Yin<sup>b</sup>, Tsugio Sato<sup>b</sup>, Yong-  
Chien Ling<sup>a,\*</sup>

<sup>a</sup>Department of Chemistry, National Tsing Hua University, Hsinchu 30013, Taiwan

<sup>b</sup>Institute of Multidisciplinary Research for Advanced Materials, Tohoku University,  
Sendai 980-8577, Japan

\*Corresponding author. Tel: +886-3-5721484; fax: +886-3-5711082.

*Email address:* ycling@mx.nthu.edu.tw (Y.C. Ling).

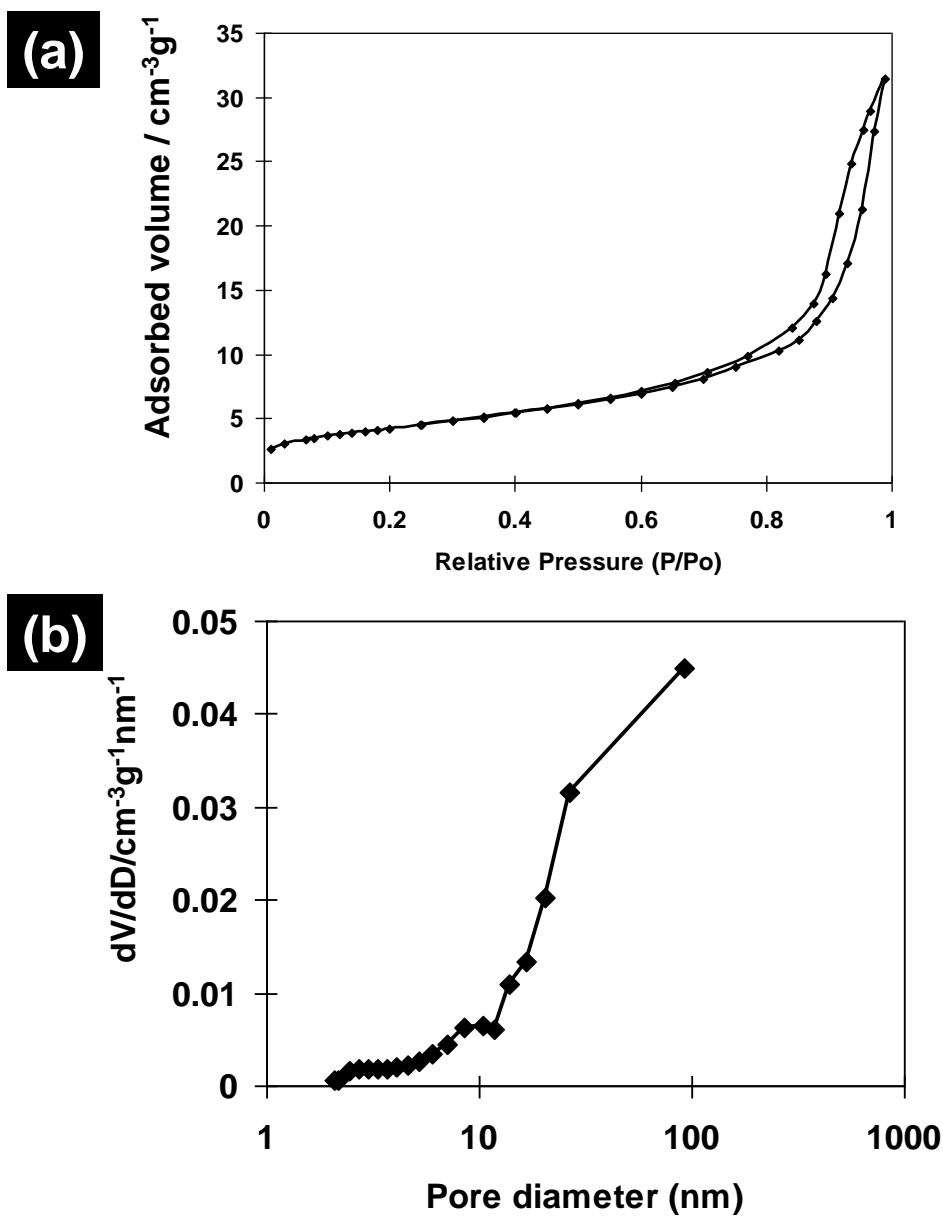

**Fig. S1** (a) Adsorption and desorption curves, and (b) pore size distribution of ZnO twin-prisms prepared with 1:1 molar ratio of Zn/lys.

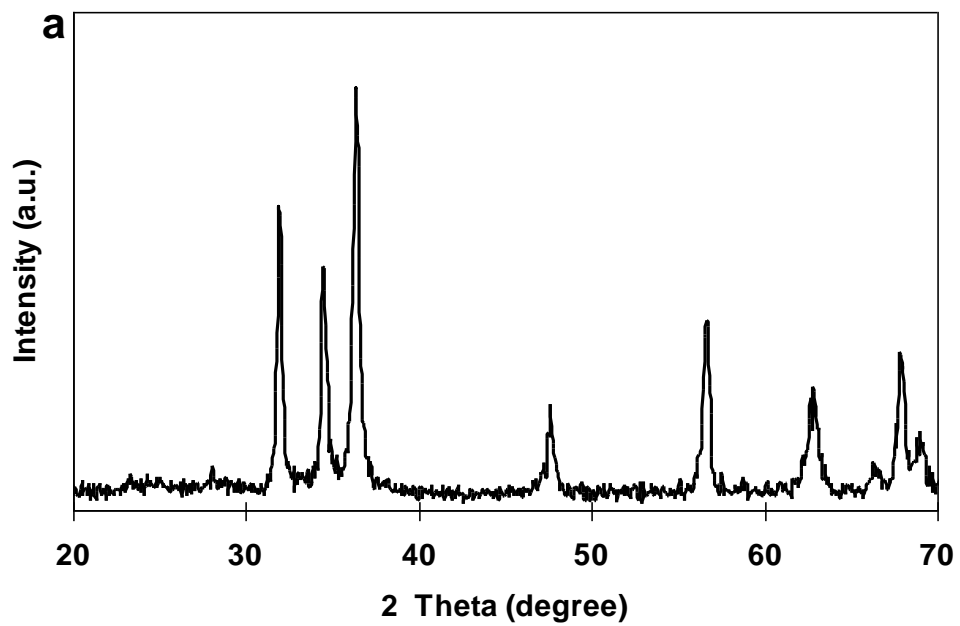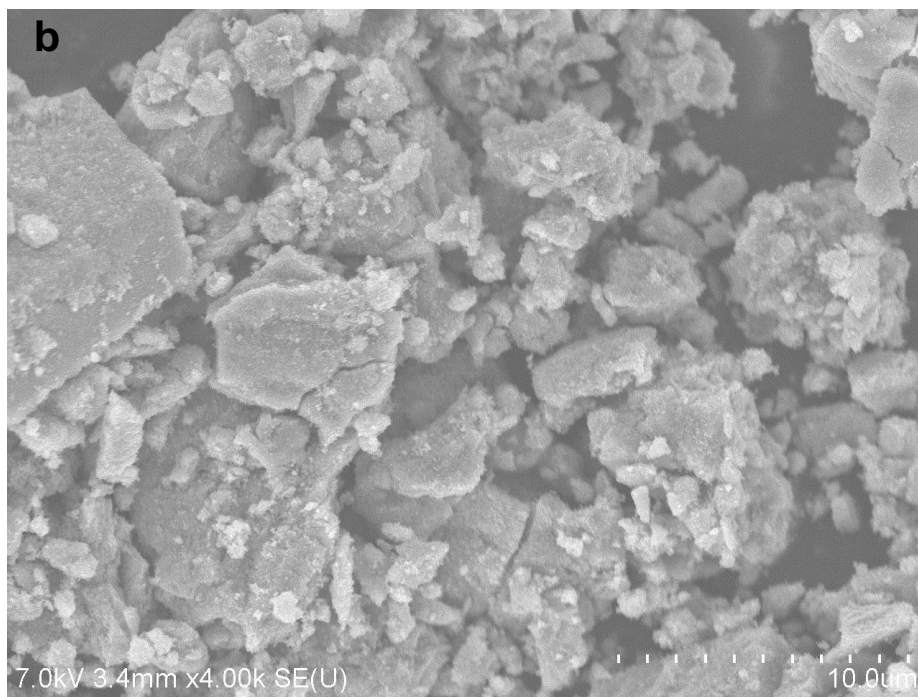

**Fig. S2** (a) XRD pattern and (b) SEM image of ZONS obtained by hydrothermal treatment of  $\text{Zn}(\text{NO}_3)_2$  added with NaOH.
